# Supplementary material
Source: publisher figshare collection journal article supplement (https://gsapubs.figshare.com/ndownloader/files/23295050)
Supplement: Supplementary file 1 [file 23295050]

### Estimation of topographic slope, topographic gradient and Moho deepening gradient for transects A-A' and B-B', as shown in Figure 4

The 50.0-km-long transect A-A' exhibits a topographic relief of 923 m (from 1339 m to 2262 m), with an average topographic slope of  $1.06^\circ$  and a topographic gradient of  $\sim 1.2\%$ . Its Moho deepens by  $\sim 7$  km (from 50 km to 57 km, with a deepening gradient of  $\sim 14\%$ ) from the basin to the orogen (Fig. 4A). The  $\sim 43.0$ -km-long transect B-B' displays a topographic relief of 546 m (from 1307 m to 1853 m) with an average topographic slope of  $0.73^\circ$  and a topographic gradient of  $\sim 1.2\%$ . Its Moho deepens by 5 km (from 49 km to 54 km with a deepening gradient of  $\sim 11\%$ ) from the basin to the orogeny (Fig. 4B).

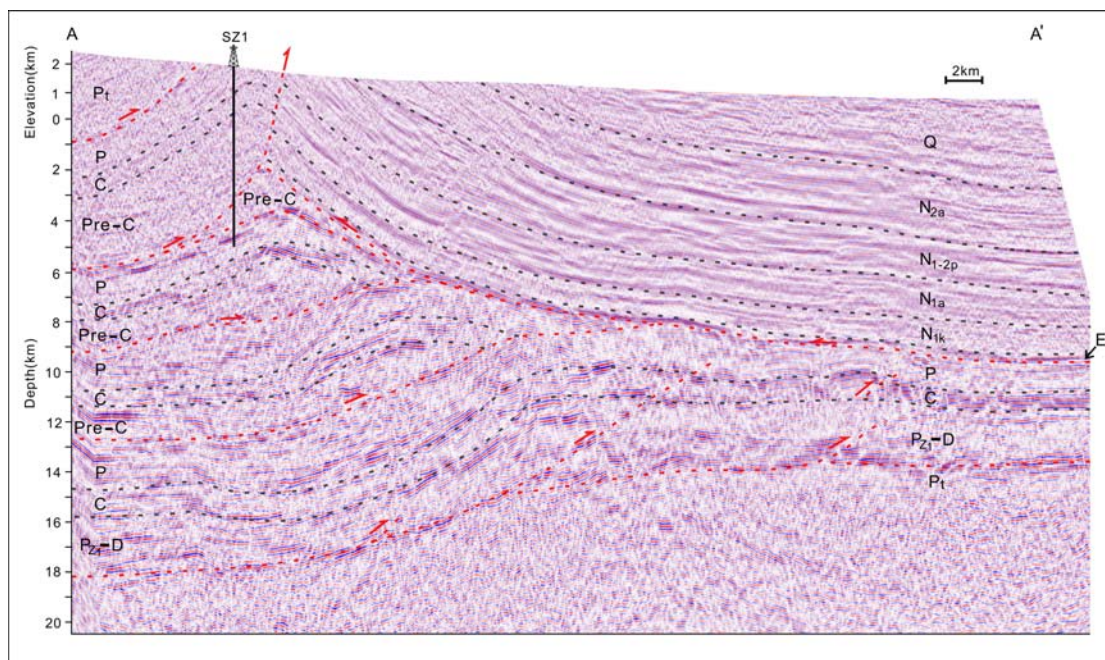

Figure DR1 Seismic reflection profiles along transect A-A' (Fig. 1). Black lines show the depths and locations of wells SZ1 and HC1. Dotted lines are interpreted stratigraphic boundaries. Letters show the stratigraphic ages as in Figure 2. Vertical exaggeration = 1.5.

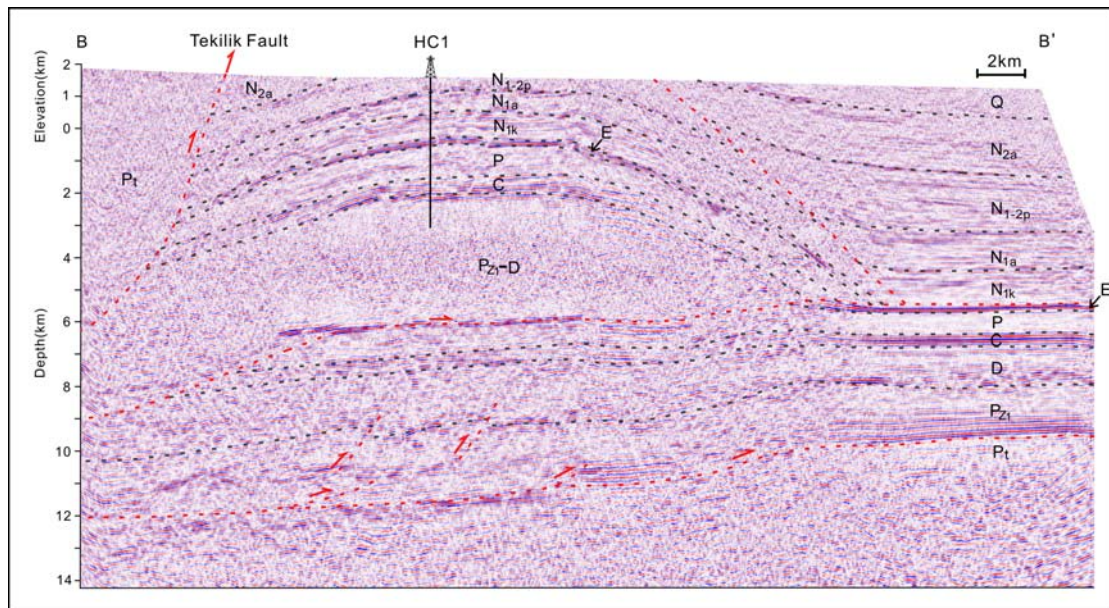

Figure DR2 Same as Fig. DR1 but for transect B-B'.

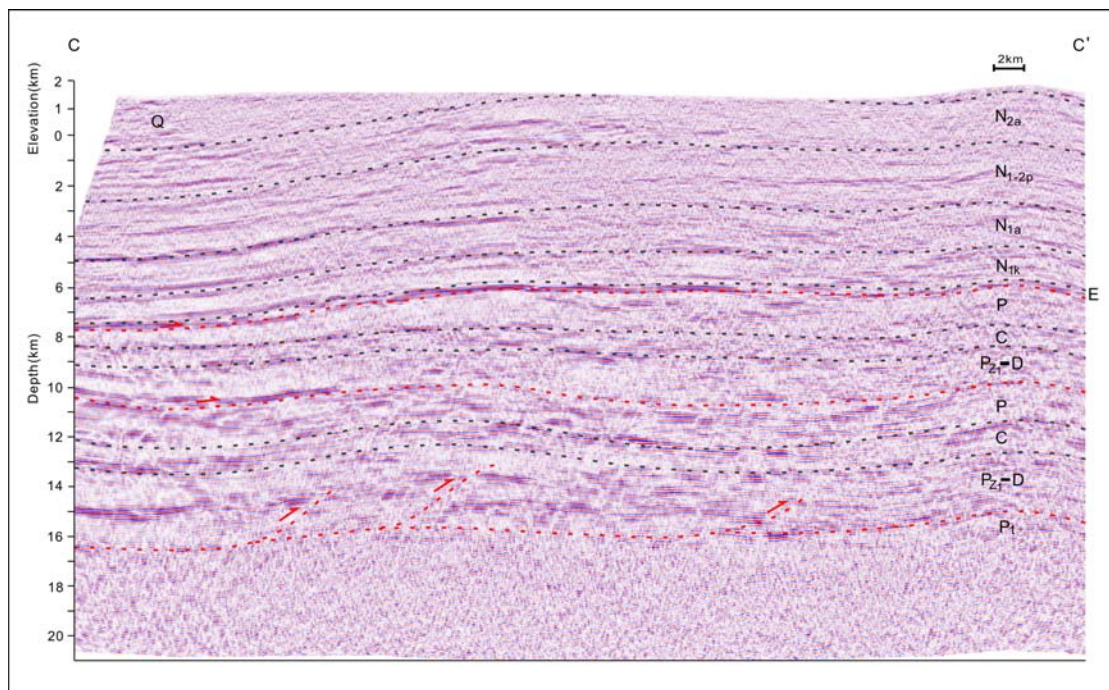

Figure DR3 Same as Fig. DR1 but for transect C-C'.

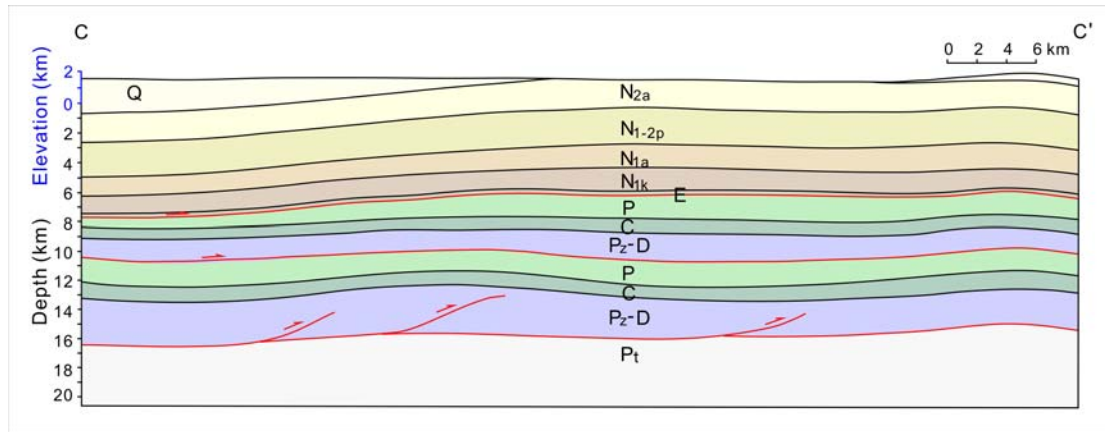

Figure DR4 Structural cross-sections for transects C-C based on interpretation of the seismic reflection results and dill well data from SZ1 and HC1. Vertical exaggeration = 1.5.

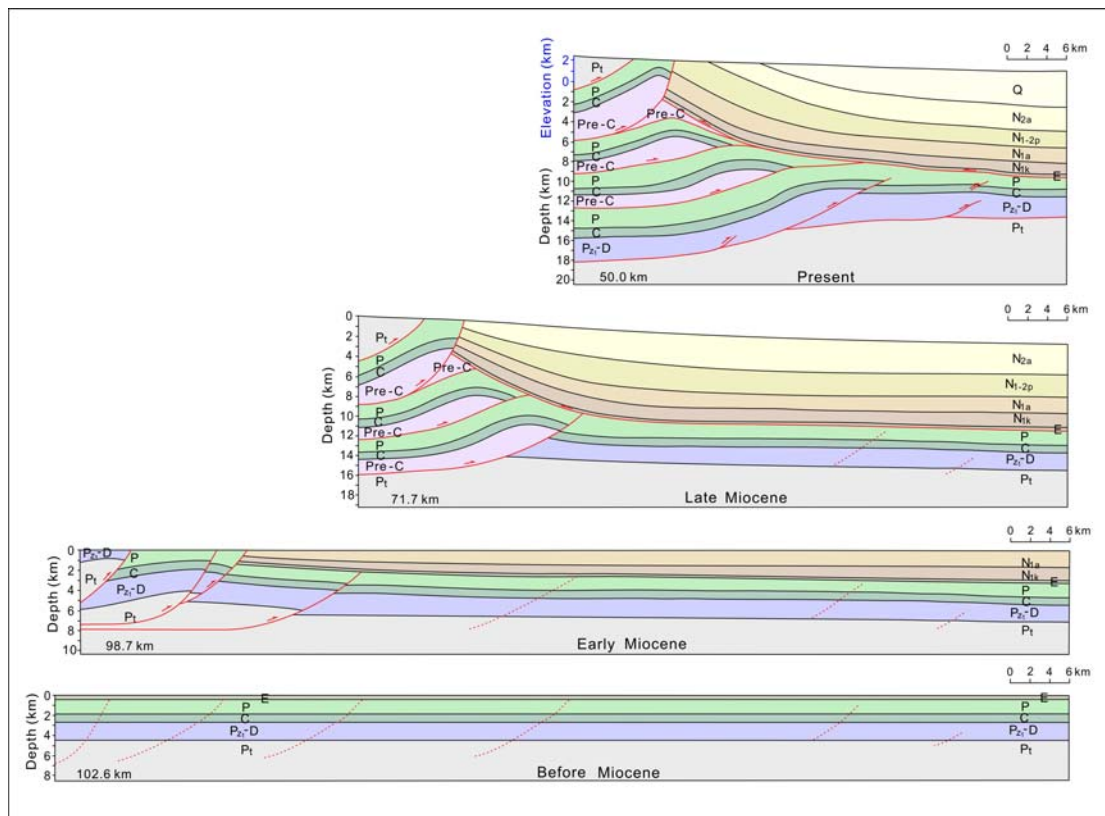

Figure DR5 Deformation history of transect A-A' established using the balanced-cross-sections method. Vertical exaggeration = 1.

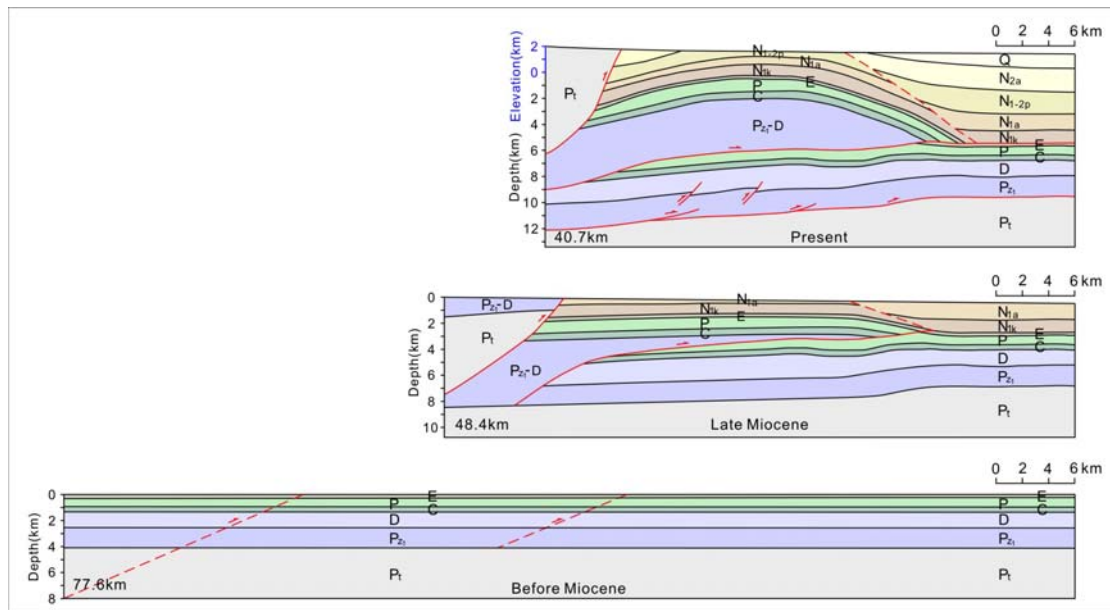

Figure DR6 Same as Fig. DR5 but for transect B-B'.
